# Supplementary material for: Predictors of continuation for asenapine from real-world data in patients with schizophrenia
Source: Research Square preprint supplement (doi:10.21203/rs.3.rs-4203201/v1), 2024-04-08
Supplement: Supplementary file 1 [file 4ef82af3bcf1c19fb26c1a0a.xlsx]

## Sheet: Table 3
Table 3. Side effects status among each groups
		CP < 600 mg/day and < 25 years (n=1200)	CP < 600 mg/day and ≥ 25 years (n=332)	CP ≥ 600 mg/day and < 25 years (n=592)	CP ≥ 600 mg/day and ≥ 25 years (n=345)	Total (n=3236*)	p value**
Patients with side effect(s)	[n (%)]	456 (38.0)	101 (30.4)	201 (34.0)	108 (31.3)	1098 (33.9)	0.0117
Akathisia	[n (%)]	94 (7.8)	11 (3.3)	27 (4.6)	9 (2.6)	163 (5.0)	< 0.0001
Somnolence	[n (%)]	69 (5.8)	7 (2.1)	28 (3.0)	7 (2.0)	124 (3.8)	0.0003
Hypoaesthesia oral	[n (%)]	66 (5.5)	9 (2.7)	36 (6.1)	9 (2.6)	155 (4.8)	0.1868
*: Patients with missing data on CP-equivalent values at the initiation of asenapine administration or the duration of illness from onset (n=767) are included.
**: Chi-square test with 1 degree of freedom
