# Supplementary material for: Predictors of continuation for asenapine from real-world data in patients with schizophrenia
Source: Research Square preprint supplement (doi:10.21203/rs.3.rs-4203201/v1), 2024-04-08
Supplement: Supplementary file 2 [file 619317ef69d687d14512de20.xlsx]

## Sheet: Table 2
	Table 2. Continuation status with asenapine administration
	Predictors from multivariate logistic regression analysis			Continuation [n (%)]		Discontinuation [n (%)]		Total
	CP equivalent (n=3190)		< 600 mg/day	751 ( 37.6%)		1249 ( 62.5%)		2000
			≥ 600 mg/day	551 ( 46.3%)		639 ( 53.7%)		1190
	Dulation of illness (n=2506)		< 25 years	673 ( 37.1%)		1142 ( 62.9%)		1815
			≥ 25 years	331 ( 47.9%)		360 ( 52.1%)		691
	Combination of predictors (n=2469)		< 600 mg/day and < 25 years	409 ( 34.1%)		791 ( 65.9%)		1200
			< 600 mg/day and ≥ 25 years	145 ( 43.7%)		187 ( 56.3%)		332
			≥ 600 mg/day and < 25 years	256 ( 43.2%)		336 ( 56.8%)		592
			≥ 600 mg/day and ≥ 25 years	181 ( 52.5%)		164 ( 47.5%)		345
	Safety status
	Side effect(s) (n=3236)		with	253 ( 23.0%)		845 ( 77.0%)		1098
			wihtout	1062 ( 49.7%)		1076 ( 50.3%)		2138
	Severe side effect (n=3236)		with	21 ( 20.6%)		81 ( 79.4%)		102
			without	1294 ( 41.3%)		1840 ( 58.7%)		3134
	Abbreviations: CP: Chlorpromazine
