# Supplementary material for: Predictors of continuation for asenapine from real-world data in patients with schizophrenia
Source: Research Square preprint supplement (doi:10.21203/rs.3.rs-4203201/v1), 2024-04-08
Supplement: Supplementary file 3 [file 6bf20e5352a845a0eaf5029c.xlsx]

## Sheet: Table 1
Table 1. Patient's characteristics before administration of asenapine
		Total (N=3236)
Male	[n, (%)]	1466 (45.3)
Mean age	[years, mean (SD)]	46.7 (15.4)
Inpatient	[n, (%)]	1471 (45.5)
Body weight	[kg, mean (SD)]	62.6 (15.5)
BMI	[mean (SD)]	23.8 (5.1)
Duration of illness	[years, mean (SD)]	16.7 (14.2)
Anxiolytics/hypnotic sedatives	[n, (%)]	1438 (44.4)
Anticonvulsant	[n, (%)]	607 (18.8)
Antiparkinson agent	[n, (%)]	609 (18.8)
Antipsychotics	[n, (%)]	2488 (76.9)
CP equivalent ≥ 600 mg/day	[n, (%)]	1190 (36.8)
Number of antipsychotics	[number of drugs, mean (SD)]	1.1 (1.0)
Abbreviations: BMI: Body mass index; CP: Chlorpromazine; SD: standard deviation
